# Supplementary material for: A molecularly imprinted fiber array solid-phase microextraction strategy for simultaneous detection of multiple estrogens
Source: Royal Society of Chemistry journal article supplement (doi:10.1039/d3tb00555k), 2023-01-01
Supplement: d3tb00555k1.pdf [file d3tb00555k1.pdf]

1  
2  
3  
4  
5  
6  
7  
8  
9  
10  
11  
12  
13  
14  
15  
16  
17  
18  
19  
20  
21  
22  
23  
24  
25  
26  
27  
28  
29  
30  
31  
32

## Supplement Information

### **Molecularly imprinted fiber array solid-phase microextraction strategy for simultaneous detection of multiple estrogens**

Qingqing Zhou<sup>1</sup>, Yunli Duan<sup>1</sup>, Zhigang Xu<sup>1\*</sup>, Yu Tian<sup>1</sup>, Zhimin Liu<sup>1\*</sup>, Chunbo Liu<sup>2</sup>,  
Pei He<sup>2</sup>, Zhihua Liu<sup>2</sup>, Xiaoxi Si<sup>2</sup>

<sup>1</sup> Faculty of Science, Kunming University of Science and Technology, Kunming  
650500, China.

<sup>2</sup> R&D Center of China Tobacco Yunnan Industrial Co. Ltd., Kunming 650231,  
China

\*Corresponding author:

xuzgkmust@gmail.com (Z.G. Xu); lab\_chem@126.com (Z.M. Liu)

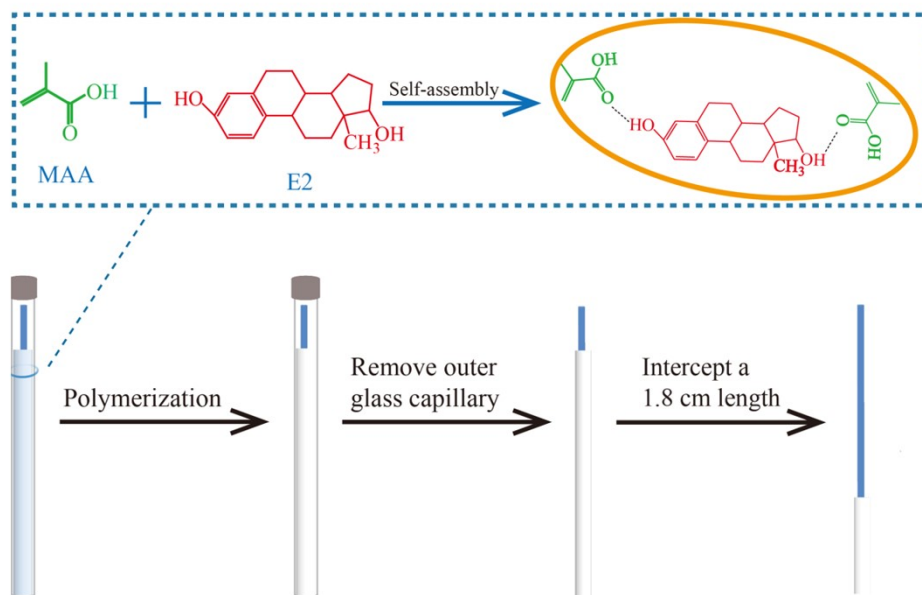

33

34

**Fig. S1.** Schematic diagram of the preparation process of MIP fiber coating.

35

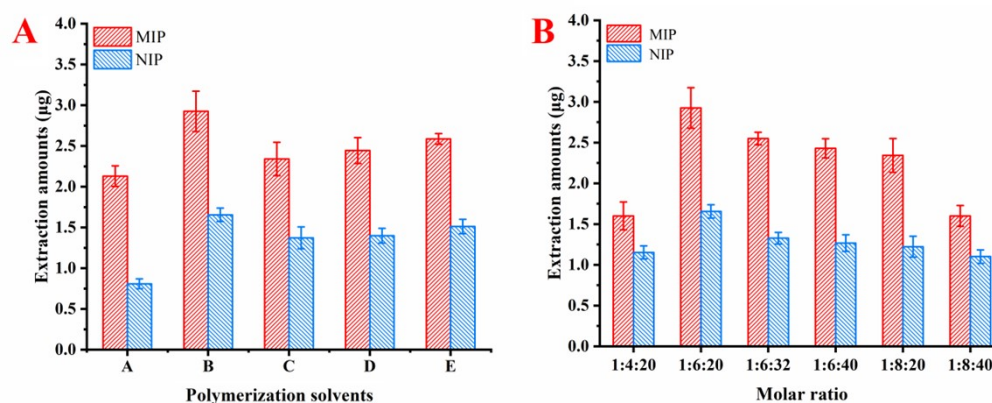

36

**Fig. S2.** Polymer solvent optimization (A), a: acetonitrile; b: methanol-acetonitrile (1:1, v/v); c: methanol-acetonitrile (1:2, v/v); d: methanol-acetonitrile (1:3, v/v); e: methanol-acetonitrile (2:3, v/v); and molar ratio optimization among template molecules, functional monomers and crosslinkers (B).

41

## 42 1. Optimisation of the extraction conditions

43 Extraction time will affect the equilibrium of extraction. The effects of extraction  
 44 time which included 60, 90, 120, 150, 180, 210 min were investigated to extract E2

45 from 50 mL of spiked water samples at a concentration of 100.00  $\mu\text{g/L}$ . Polymer  
46 coating was then immersed in 0.25 mL desorption solvent of methanol-acetic acid  
47 (9:1, v/v). At the same time, the coating was desorbed by ultrasound for 10 minutes.  
48 As shown in [Fig. 2A](#), the amount of E2 extracted increases with extraction time. The  
49 extraction amount of E2 reaches highest at 120 min. With further increases the  
50 extraction time did not significantly increase the extraction amount of the E2.  
51 Therefore, 120 min was chosen as sufficient for effective extraction of E2.

52 This study desorption time of 3, 5, 10, 15 and 20 min were investigated to  
53 achieve high desorption efficiency of the E2 from sorbents. No significant difference  
54 was seen between 5 minutes and 10 minutes desorption. Thus, 5 min was chosen as  
55 optimum desorption time ([Fig. 2B](#)).

56 The desorption solvent is a critical factor during the desorption process which  
57 should sufficiently break the hydrogen bonds between the E2 and MAA. Five  
58 desorption solvents including acetonitrile-acetic acid (9: 1, v/v), acetonitrile,  
59 methanol-acetonitrile (1:1, v/v), methanol and methanol-acetic acid (9:1, v/v) were  
60 investigated ([Fig. 2C](#)). The best desorption performance of the polymer was achieved  
61 when the mixture of methanol-acetic acid (9:1, v/v) was selected as desorption solvent.

62 Considering ionic strength could affect the binding amount of analytes by  
63 squeezing-out and salting-out effects. The effect of ionic strength examined using  
64 NaCl solutions varying in mass fractions from 0% to 20%. As shown in [Fig. 2D](#), the  
65 adsorption amount of E2 by polymer decreased with the mass fraction increase of  
66 NaCl. This may be due to the squeezing-out effect being stronger than that of salting-

67 out which unfavorable for E2 adsorption. Furthermore, the added ions may penetrate  
68 into the diffuse bilayer on surfaces of absorbent, reducing the repulsion between  
69 absorbers and producing in a compact aggregate structure <sup>1,2</sup>. Thus, increasing NaCl  
70 had adversely influence on adsorption of E2 by polymer. Consequently, experiments  
71 were carried out without adding NaCl.

72 The pH value of extraction solvent could affect the presence forms of the target  
73 analytes, so impacting the extraction performance of coating. We use hydrochloric  
74 acid (0.1 M HCl) or sodium hydroxide (0.1 M NaOH) to adjust the pH of extracted  
75 aqueous solution. E2 has a pKa value of 10.5. At pH 10.5, E2 presents neutral (about  
76 40%) and anionic (about 60%) forms. When value of pH below 8.0, E2 is in its  
77 neutral forms (90 to 99%) <sup>3</sup>. When E2 is in molecular form it facilitates the formation  
78 of hydrogen bonds between the hydroxyl group in E2 and the carboxyl group in the  
79 polymer. Furthermore, the protonation of hydroxyl groups of E2 at pH <4 <sup>4</sup>, which  
80 weakened the H-bonding between the polymer and E2. So we expect the optimal pH  
81 range for the extraction around pH 4.0–8.0. As present in [Fig. 2E](#) with the increase of  
82 pH value, the extraction amount increase first and then start decreasing, when the pH  
83 value is 7.0 the extraction amount reach to the maximum. However, when the pH  
84 value is 8.0, the extraction amount decreased significantly. Therefore, the solution pH  
85 was maintained at 7.0 to obtain the maximum extraction amount.

86

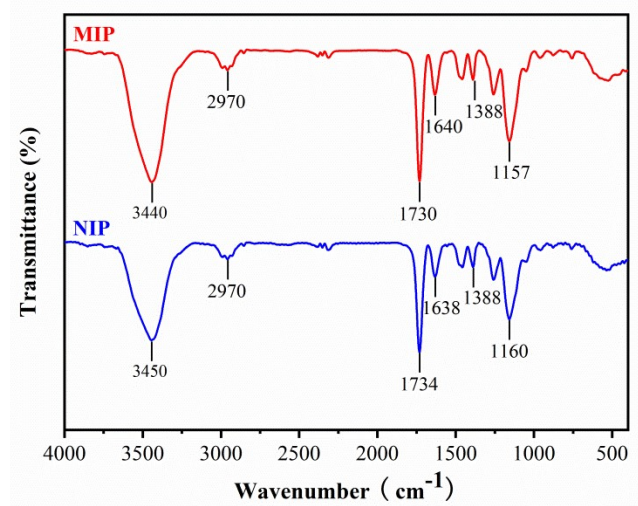

87  
88 **Fig. S3.** FT-IR spectra of MIP and NIP coatings.  
89  
90

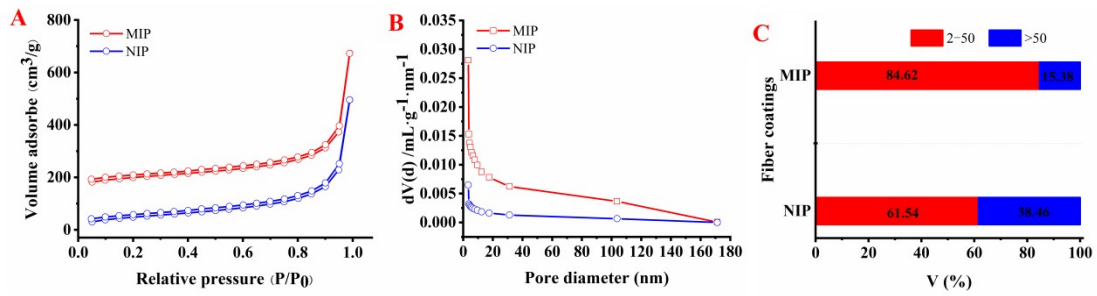

91  
92 **Fig. S4.** Nitrogen adsorption-desorption isotherms (A), pore size distribution of the MIP and NIP  
93 (B), and different pore size ratio analysis (C).  
94

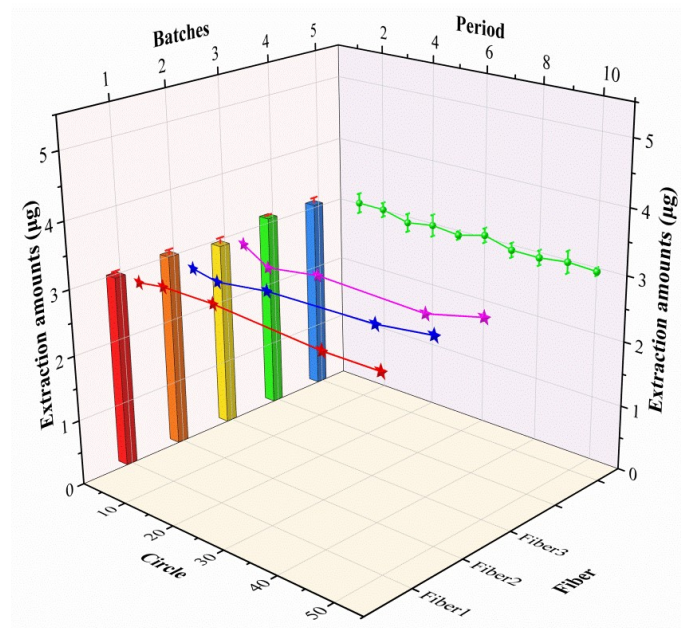

95  
96 **Fig. S5.** Evaluation of extraction stability of MIP fiber array. Every 12 hours represent a period.

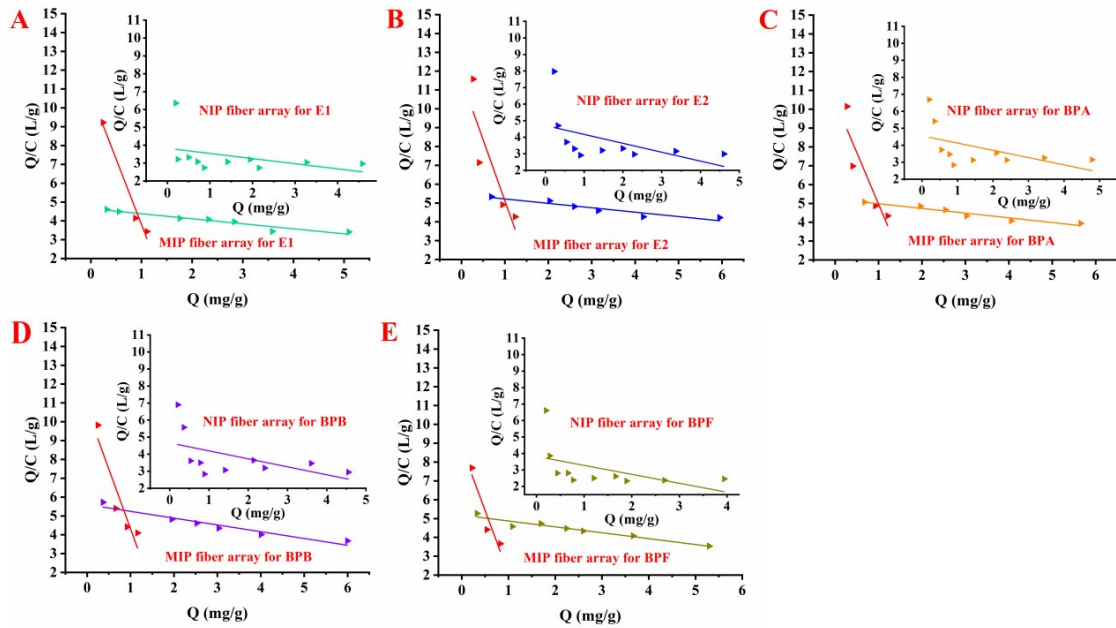

97

98 **Fig. S6.** Scatchard fitting curves. MIP fiber array adsorption estrogens (A)-(E), and  
 99 insets show NIP fiber array adsorption estrogens, respectively.

100

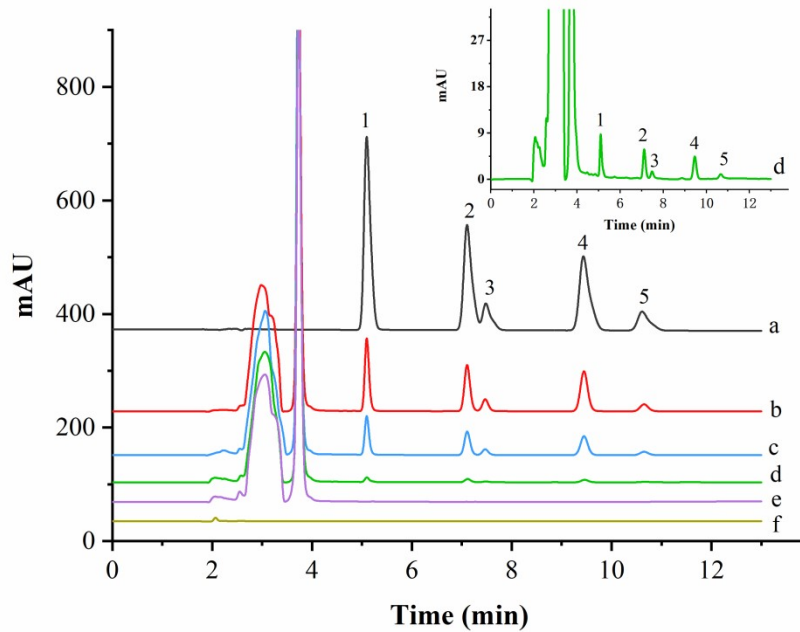

101

102 **Fig. S7.** Chromatograms for the analysis of five estrogens in milk. (a) 20.00 mg/L mixed standard;  
 103 (b), (c), (d), The spiked sample of the 100.00, 50.00, 5.00  $\mu\text{g/L}$  estrogens mixed standard solution  
 104 was extracted by the MIP-SPME fiber array, respectively; (e) The sample extracted by the MIP-  
 105 SPME fiber array; (f) The sample used for direct detection; (1) bisphenol F, (2) bisphenol A, (3)  
 106 17 $\beta$ -estradiol, (4) bisphenol B, (5) estrone.

107

108 **Supplementary tables**109 **Table S1.** Atomic charges in 17 $\beta$ -estradiol (E2) and methacrylic acid (MAA).

| E2     |               | MAA    |               |
|--------|---------------|--------|---------------|
| Atom   | Atomic charge | Atom   | Atomic charge |
| C (1)  | -0.078        | C (1)  | -0.01         |
| C (2)  | -0.12         | C (2)  | -0.176        |
| C (3)  | 0.277         | C (3)  | 0.49          |
| C (4)  | -0.146        | C (4)  | -0.23         |
| C (5)  | 0.045         | O (5)  | -0.421        |
| C (6)  | 0.044         | O (6)  | -0.416        |
| C (7)  | -0.192        | H (7)  | 0.113         |
| C (8)  | -0.158        | H (8)  | 0.085         |
| C (9)  | -0.109        | H (9)  | 0.081         |
| C (10) | -0.154        | H (10) | 0.107         |
| C (11) | -0.087        | H (11) | 0.107         |
| C (12) | -0.128        | H (12) | 0.271         |
| C (13) | -0.117        |        |               |
| C (14) | -0.167        |        |               |
| C (15) | -0.163        |        |               |
| C (16) | -0.161        |        |               |
| C (17) | 0.165         |        |               |
| C (18) | -0.187        |        |               |
| O (19) | -0.476        |        |               |
| O (20) | -0.441        |        |               |
| H (21) | 0.07          |        |               |
| H (22) | 0.077         |        |               |
| H (23) | 0.054         |        |               |
| H (24) | 0.098         |        |               |
| H (25) | 0.087         |        |               |
| H (26) | 0.088         |        |               |
| H (27) | 0.076         |        |               |
| H (28) | 0.089         |        |               |
| H (29) | 0.113         |        |               |
| H (30) | 0.083         |        |               |
| H (31) | 0.082         |        |               |
| H (32) | 0.085         |        |               |
| H (33) | 0.106         |        |               |
| H (34) | 0.092         |        |               |
| H (35) | 0.084         |        |               |
| H (36) | 0.09          |        |               |
| H (37) | 0.106         |        |               |
| H (38) | 0.085         |        |               |

|        |       |
|--------|-------|
| H (39) | 0.064 |
| H (40) | 0.073 |
| H (41) | 0.064 |
| H (42) | 0.079 |
| H (43) | 0.253 |
| H (44) | 0.258 |

110

111 **Table S2.** Brunauer-Emmett-Teller (BET) measures surface area and pore parameters.

| Fibers | Surface area (m <sup>2</sup> /g) | Average pore Diameter (nm) | Total pore volume (cm <sup>3</sup> /g) |
|--------|----------------------------------|----------------------------|----------------------------------------|
| MIP    | 235.935                          | 1.413                      | 8.337                                  |
| NIP    | 237.875                          | 6.673                      | 7.936                                  |

112

113 **Table S3.** The RSD of inter-day, inter-day, batches and cycles.

|         | inter-day | intra-day | batches | cycles |
|---------|-----------|-----------|---------|--------|
| RSD (%) | 4.16      | 3.92      | 3.47    | 3.59   |

114

115 **Table S4.** Structure of the seven analogues.

| Compounds             | Structure                                                                           | Molecular weight | pKa (predicted) |
|-----------------------|-------------------------------------------------------------------------------------|------------------|-----------------|
| 17 $\beta$ -estradiol | 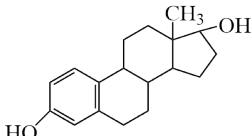 | 272.38           | 10.27           |
| Estrone               |  | 270.37           | 10.25           |
| Bisphenol A           |  | 228.29           | 10.29           |
| Bisphenol B           |  | 242.31           | 10.27           |
| Bisphenol F           |  | 200.23           | 9.91            |



|                    |                                                                                   |        |      |
|--------------------|-----------------------------------------------------------------------------------|--------|------|
| Dimethyl phthalate | 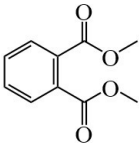 | 194.18 | 3.42 |
| Phenol             |  | 94.11  | 9.86 |

116

117

118 **Table S5.** Distribution coefficients (*K<sub>d</sub>*), enrichment factor (*EF*) and imprinting factor (*IF*)  
 119 calculated from the selectivity study.

| Analytes | <i>K<sub>d</sub></i> MIP | <i>K<sub>d</sub></i> NIP | <i>EF</i> MIP | <i>EF</i> NIP | <i>IF</i> |
|----------|--------------------------|--------------------------|---------------|---------------|-----------|
| E2       | 9924.90                  | 9901.07                  | 133.16        | 101.08        | 1.32      |
| E1       | 9912.84                  | 9885.57                  | 114.73        | 87.39         | 1.31      |
| BPA      | 9920.98                  | 9889.52                  | 126.55        | 97.73         | 1.29      |
| BPB      | 9915.08                  | 9893.30                  | 118.03        | 93.72         | 1.26      |
| BPF      | 9907.39                  | 9866.51                  | 99.60         | 77.91         | 1.28      |
| DMP      | 9526.13                  | 9480.30                  | 21.10         | 19.24         | 1.10      |
| Phenol   | 7242.90                  | 6901.56                  | 3.63          | 3.23          | 1.12      |

120

121

122 **Table S6.** Analysis of desorption rate and extraction rate (100.00 µg/L).

| Analytes | Desorption rate /% |       | Extraction rate /% |       |
|----------|--------------------|-------|--------------------|-------|
|          | MIP                | NIP   | MIP                | NIP   |
| E2       | 84.29              | 84.20 | 78.99              | 60.03 |
| E1       | 83.56              | 83.28 | 68.64              | 52.47 |
| BPA      | 83.35              | 82.51 | 75.91              | 54.85 |
| BPB      | 81.19              | 81.53 | 76.59              | 57.48 |
| BPF      | 86.87              | 86.76 | 62.15              | 43.17 |
| DMP      | 88.51              | 95.17 | 11.92              | 10.11 |
| Phenol   | 83.59              | 80.60 | 2.17               | 1.46  |

123

124

125

126

127

128

129

130

131

132

133

134 **Table S7.** Scatchard fitting parameter analysis.

| Fiber array | Analytes | Low-affinity sites          |                               | High-affinity sites         |                               |
|-------------|----------|-----------------------------|-------------------------------|-----------------------------|-------------------------------|
|             |          | <i>K<sub>a</sub></i> (mg/L) | <i>Q<sub>max</sub></i> (mg/g) | <i>K<sub>a</sub></i> (mg/L) | <i>Q<sub>max</sub></i> (mg/g) |
| MIP         | E2       | 4.28                        | 23.31                         | 0.15                        | 1.79                          |
|             | E1       | 3.74                        | 17.40                         | 0.14                        | 1.57                          |
|             | BPA      | 4.00                        | 20.97                         | 0.18                        | 1.91                          |
|             | BPB      | 2.78                        | 15.56                         | 0.16                        | 1.68                          |
|             | BPF      | 3.20                        | 16.58                         | 0.15                        | 1.31                          |
| NIP         | E2       | 1.86                        | 8.75                          | /                           | /                             |
|             | E1       | 2.08                        | 7.45                          | /                           | /                             |
|             | BPA      | 2.34                        | 10.64                         | /                           | /                             |
|             | BPB      | 2.14                        | 9.98                          | /                           | /                             |
|             | BPF      | 1.84                        | 7.03                          | /                           | /                             |

135

136 **Table S8.** The established method in dairy products sample.

| Analytes | Linear range (µg/L) | Liner equation   | R <sup>2</sup> | LOD    | LOQ    |
|----------|---------------------|------------------|----------------|--------|--------|
|          |                     |                  |                | (µg/L) | (µg/L) |
| E2       | 1.00–200.00         | Y=0.0233X+0.0713 | 0.9992         |        |        |
| E1       | 1.00–200.00         | Y=0.0205X+0.0371 | 0.9995         |        |        |
| BPA      | 1.00–200.00         | Y=0.0707X+0.1430 | 0.9998         | 0.33   | 1.00   |
| BPB      | 1.00–200.00         | Y=0.0790X+0.1155 | 0.9998         |        |        |
| BPF      | 1.00–200.00         | Y=0.0655X+0.2751 | 0.9967         |        |        |

137

138 **Table S9.** The spiked recovery of the milk and yogurt dairy product samples analysis.

| Samples | Analytes | Found (µg/L) | Spiked concentration (µg/L)  |              |         |                              |              |         |                              |              |         |
|---------|----------|--------------|------------------------------|--------------|---------|------------------------------|--------------|---------|------------------------------|--------------|---------|
|         |          |              | 5.00                         |              |         | 50.00                        |              |         | 100.00                       |              |         |
|         |          |              | Detected <sup>a</sup> (µg/L) | Recovery (%) | RSD (%) | Detected <sup>a</sup> (µg/L) | Recovery (%) | RSD (%) | Detected <sup>a</sup> (µg/L) | Recovery (%) | RSD (%) |
| Milk-1  | E2       | /            | 5.14                         | 102.87       | 8.25    | 54.12                        | 108.23       | 6.06    | 103.66                       | 103.66       | 0.52    |
|         | E1       | /            | 5.05                         | 101.07       | 7.92    | 59.53                        | 119.05       | 7.09    | 97.37                        | 97.37        | 4.02    |
|         | BPA      | /            | 5.22                         | 104.35       | 9.42    | 51.38                        | 102.76       | 6.86    | 100.11                       | 100.11       | 2.45    |
|         | BPB      | /            | 4.62                         | 92.41        | 9.40    | 51.40                        | 102.79       | 5.65    | 101.21                       | 101.21       | 6.23    |
|         | BPF      | /            | 4.59                         | 91.79        | 7.41    | 58.95                        | 117.90       | 3.61    | 98.10                        | 98.10        | 2.42    |
| Milk-2  | E2       | /            | 4.02                         | 80.43        | 5.54    | 48.40                        | 96.80        | 9.42    | 107.31                       | 107.31       | 5.67    |
|         | E1       | /            | 4.13                         | 82.54        | 5.88    | 46.75                        | 93.50        | 5.82    | 92.70                        | 92.70        | 5.07    |
|         | BPA      | /            | 5.69                         | 113.83       | 2.87    | 59.70                        | 119.41       | 4.78    | 113.74                       | 113.74       | 1.40    |
|         | BPB      | /            | 4.19                         | 83.70        | 6.53    | 56.07                        | 112.13       | 6.02    | 118.55                       | 118.55       | 6.50    |
|         | BPF      | /            | 5.12                         | 102.47       | 5.99    | 55.78                        | 111.56       | 7.59    | 118.35                       | 118.35       | 3.94    |
| Milk-3  | E2       | /            | 3.74                         | 74.75        | 6.54    | 42.92                        | 85.83        | 0.92    | 93.79                        | 93.79        | 8.52    |
|         | E1       | /            | 4.38                         | 87.54        | 9.07    | 56.56                        | 113.11       | 0.62    | 103.35                       | 103.35       | 5.06    |

|              |     |   |      |        |      |       |        |          |        |        |      |
|--------------|-----|---|------|--------|------|-------|--------|----------|--------|--------|------|
|              | BPA | / | 5.74 | 114.78 | 6.86 | 53.82 | 107.63 | 1.81     | 110.77 | 110.77 | 6.80 |
|              | BPB | / | 4.62 | 92.41  | 7.21 | 58.95 | 117.90 | 0.47     | 110.01 | 110.01 | 6.66 |
|              | BPF | / | 4.04 | 80.70  | 8.08 | 48.60 | 97.20  | 4.<br>25 | 114.40 | 114.40 | 8.48 |
|              | E2  | / | 3.77 | 75.42  | 9.22 | 38.78 | 77.55  | 6.09     | 83.62  | 83.62  | 5.72 |
| Yogurt-<br>1 | E1  | / | 5.45 | 108.94 | 1.23 | 49.25 | 98.51  | 6.45     | 100.89 | 100.89 | 7.39 |
|              | BPA | / | 5.97 | 119.35 | 3.04 | 55.45 | 110.89 | 9.02     | 112.79 | 112.79 | 2.83 |
|              | BPB | / | 5.42 | 108.94 | 1.48 | 59.24 | 118.47 | 7.27     | 117.05 | 117.05 | 3.79 |
|              | BPF | / | 5.94 | 118.72 | 5.92 | 57.65 | 115.30 | 2.51     | 117.98 | 117.98 | 3.93 |

139 "/" means not found.

140 <sup>a</sup>Data were expressed as the mean Detected concentration determined from triplicate independent experiments.

141

## 142 References

143 1. L. Jiang, Y. Liu, G. Zeng, S. Liu, X. Hu, L. Zhou, X. Tan, N. Liu, M. Li, and J. Wen, *Chem.*

144 *Eng. J.*, 2018, **339**, 296-302.

145 2. X. Dong, L. He, H. Hu, N. Liu, S. Gao, and Y. Piao, *Chem. Eng. J.*, 2018, **352**, 371-379.

146 3. W. Liu, H. Li, S. Yu, J. Zhang, W. Zheng, L. Niu, and G. Li, *Biosens. Bioelectron.*, 2018, **104**,

147 79-86.

148 4. H. L. de Oliveira, B.C. Pires, L.S. Teixeira, L.A.F. Dinali, N.S. Simões, W. d. S. Borges, and

149 K.B. Borges, *Microchem. J.*, 2019, **149**, 104043-104055.

150
